# Supplementary material
Source: HighWire-hosted journal article supplement (http://www.cmaj.ca/highwire/filestream/58228/field_highwire_adjunct_files/7/know-clark-8-at_online.pdf)
Supplement: know-clark-8-at_online.pdf [file know-clark-8-at_online.pdf]

**Appendix 8: Ranking\* by 101 Members of Parliament and senior aides of 8 barriers to increased funding of health research, by years of service**

| Barrier (as stated in questionnaire)                              | Years of service; mean ranking (SD) |           |           |
|-------------------------------------------------------------------|-------------------------------------|-----------|-----------|
|                                                                   | ≤ 7 years                           | ≥ 8 years | Total     |
| There are too many other competing priorities                     | 7.2 (2.2)                           | 7.0 (2.2) | 7.2 (2.2) |
| Investing in front-line health care is a better use of the money  | 6.1 (2.4)                           | 5.8 (2.5) | 6.0 (2.4) |
| We do not know where the money is going and how it is spent       | 5.3 (2.6)                           | 3.9 (2.2) | 4.8 (2.6) |
| The research being conducted is not a priority for the government | 5.1 (2.3)                           | 3.9 (2.2) | 4.7 (2.3) |
| Research is too expensive                                         | 4.6 (2.2)                           | 4.4 (2.2) | 4.5 (2.2) |
| We do not know if the research will be used                       | 4.3 (2.6)                           | 3.5 (2.2) | 4.0 (2.5) |
| We cannot be assured that the best science is being done          | 4.2 (2.7)                           | 3.1 (2.1) | 3.8 (2.5) |
| Research provides no real benefit to the health care system       | 2.5 (1.7)                           | 2.5 (1.6) | 2.5 (1.7) |

Note: SD = standard deviation

\*Ranking was on a scale of 1 (insignificant) to 10 (extremely significant).
